# Supplementary material
Source: ML conference proceedings conference paper supplement (https://openreview.net/forum?id=Huw15LqglI)

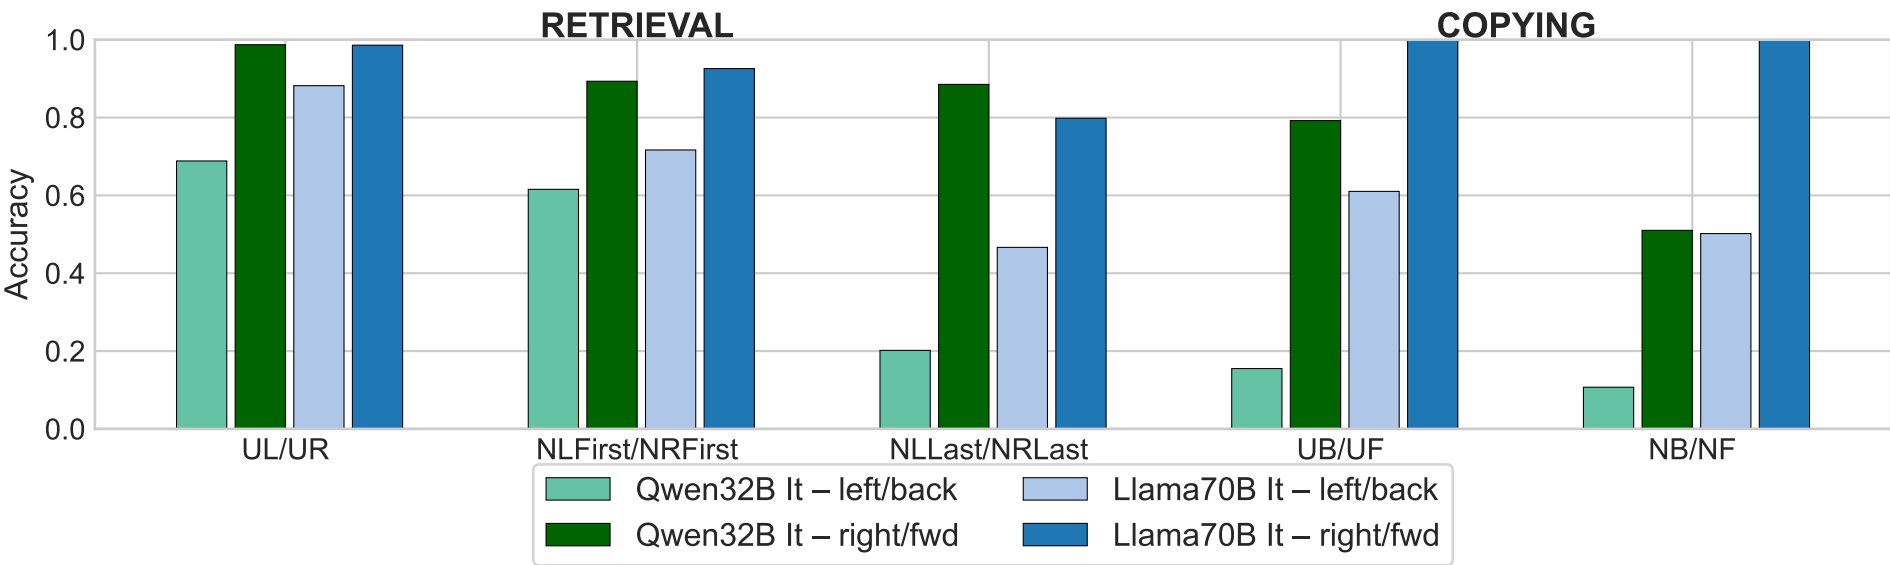

Supplement: supplementary_material [file combined_retrieve_copy_70B_instruct.pdf › visualisations/combined_retrieve_copy_70B_instruct.pdf]

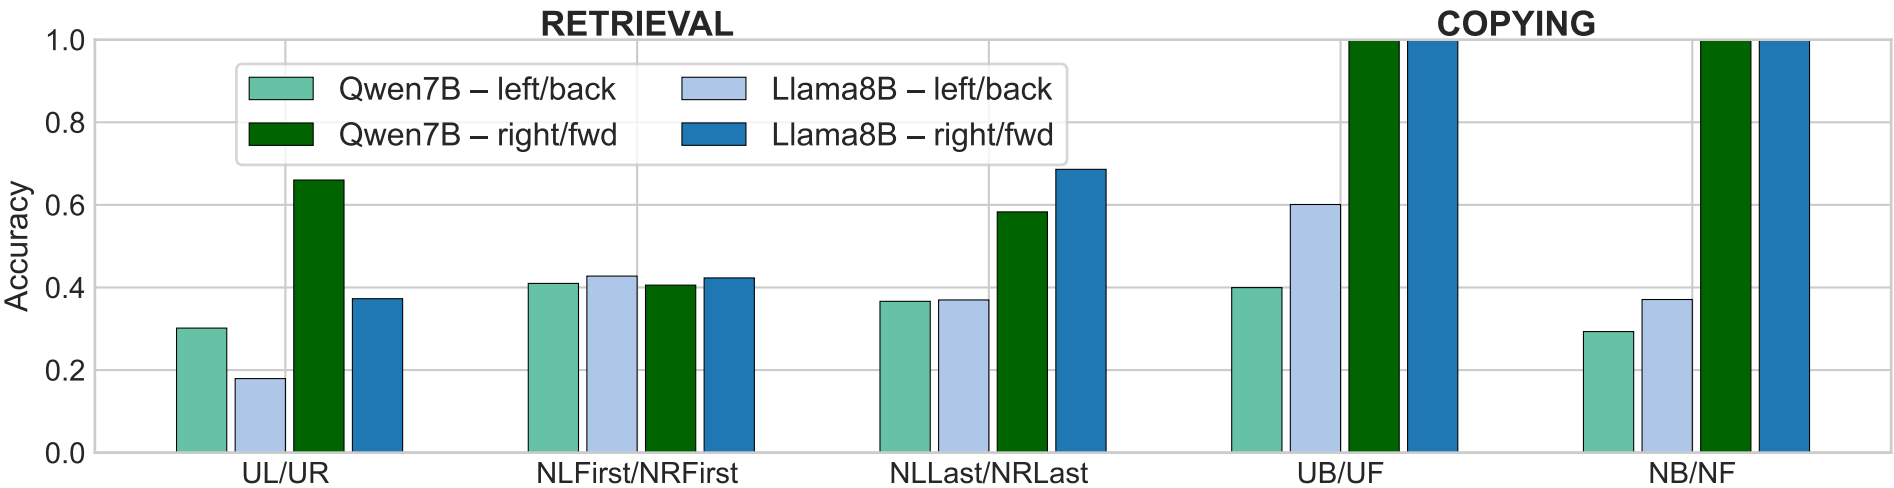

Supplement: supplementary_material [file combined_retrieve_copy_8B.pdf › visualisations/combined_retrieve_copy_8B.pdf]

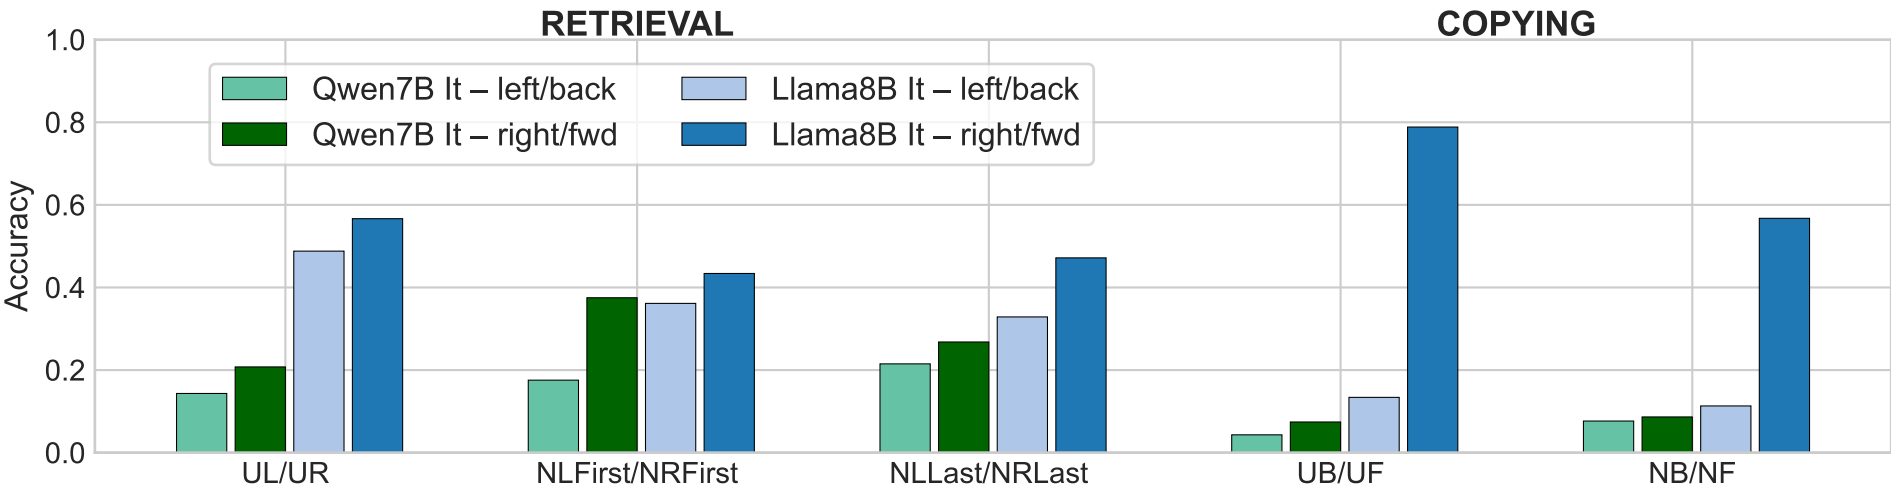

Supplement: supplementary_material [file combined_retrieve_copy_8B_instruct.pdf › visualisations/combined_retrieve_copy_8B_instruct.pdf]

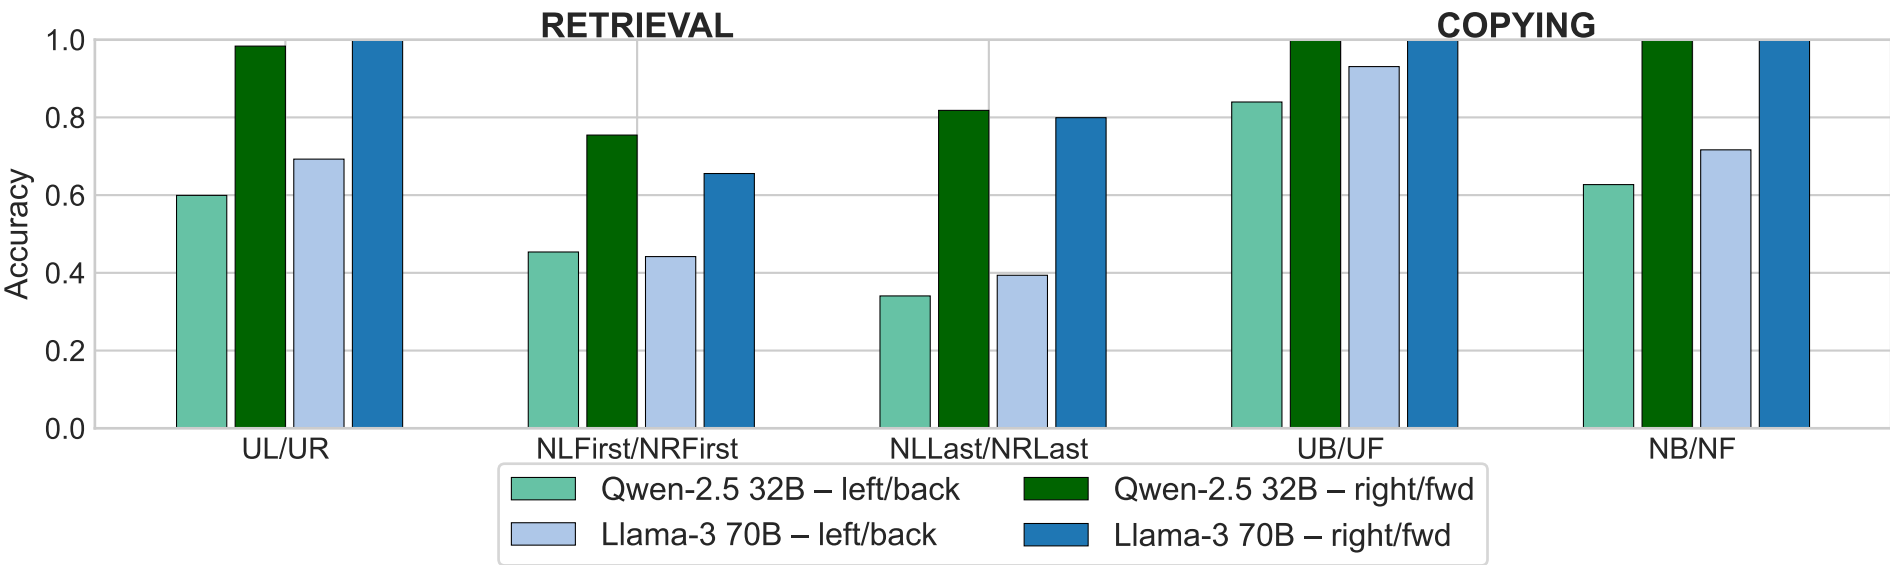

Supplement: supplementary_material [file combined_retrieve_copy_completion.pdf › visualisations/combined_retrieve_copy_completion.pdf]

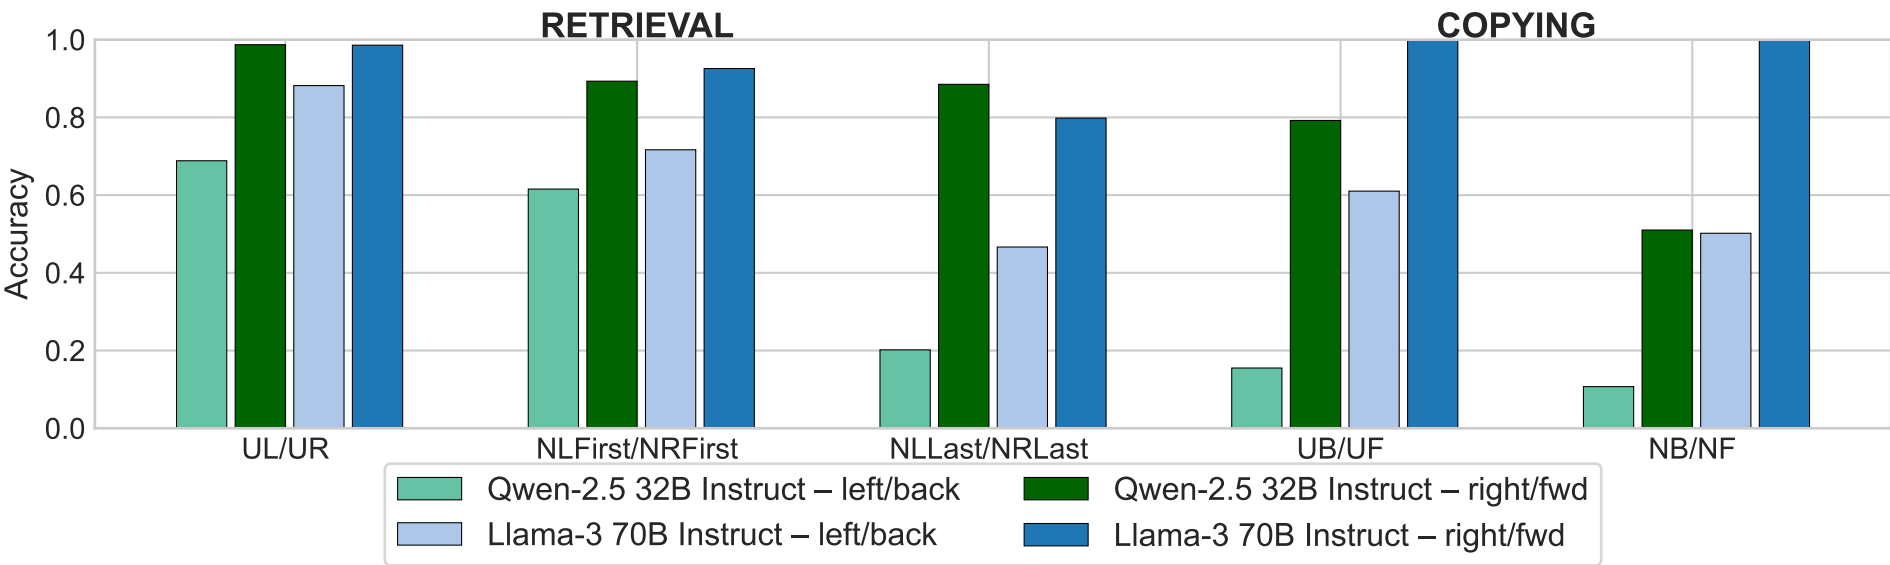

Supplement: supplementary_material [file combined_retrieve_copy_instruct.pdf › visualisations/combined_retrieve_copy_instruct.pdf]

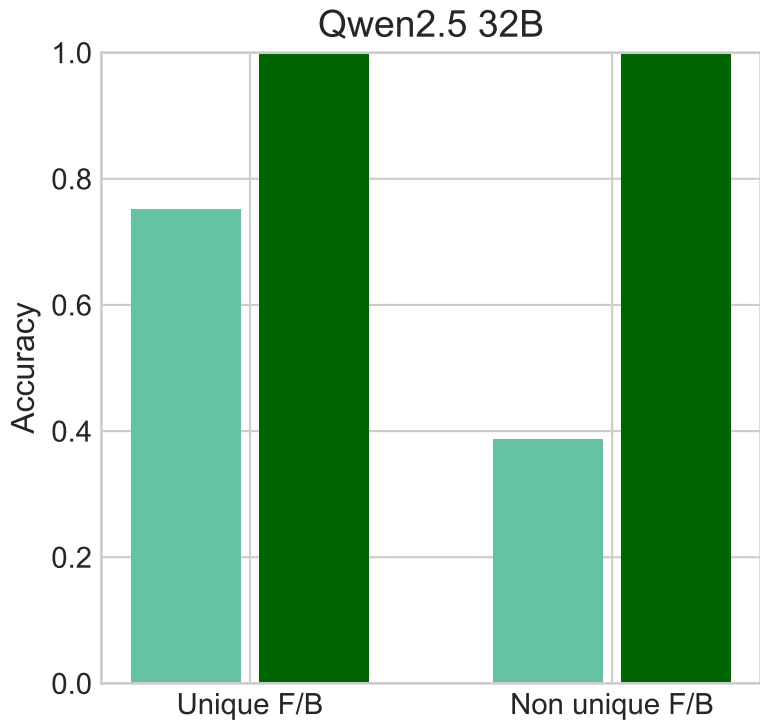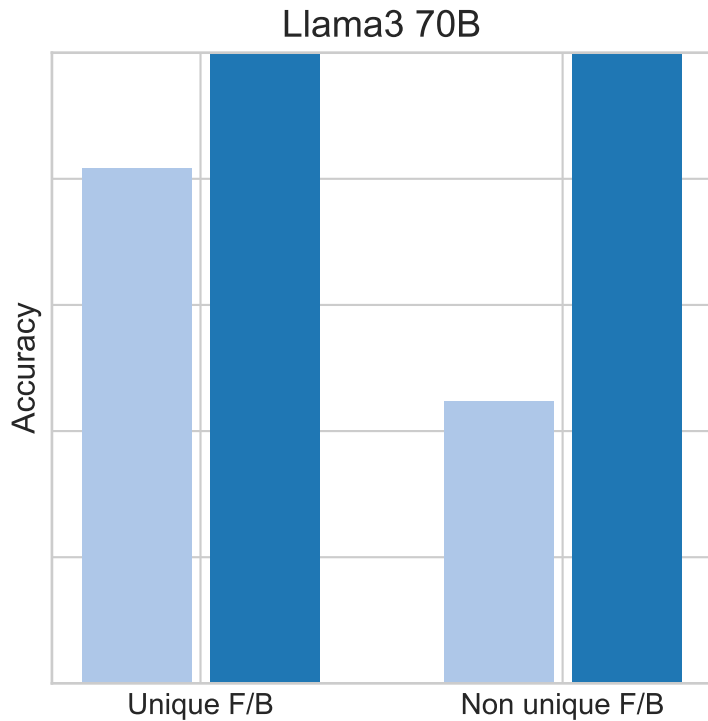

Supplement: supplementary_material [file copy_accuracy.pdf › visualisations/copy_accuracy.pdf]

Qwen2.5 32B

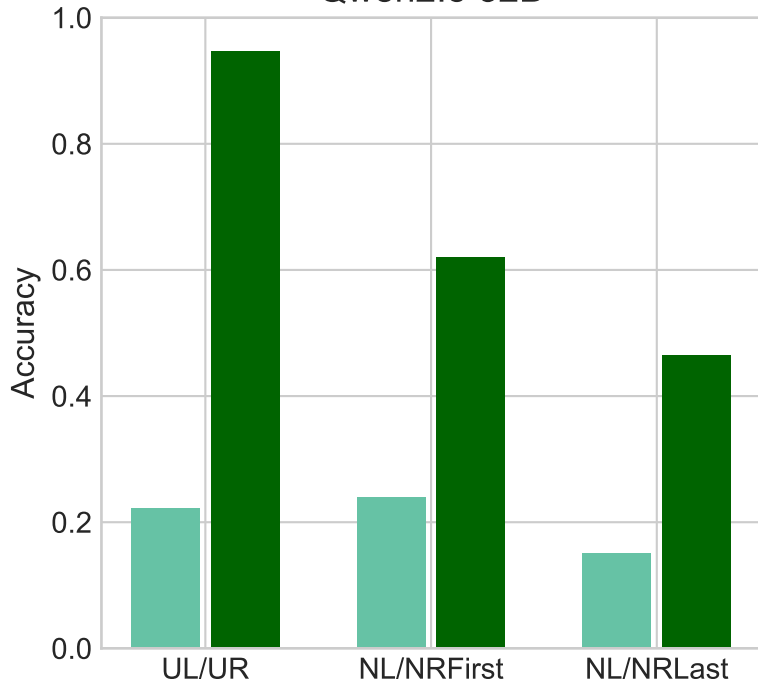

Llama3 70B

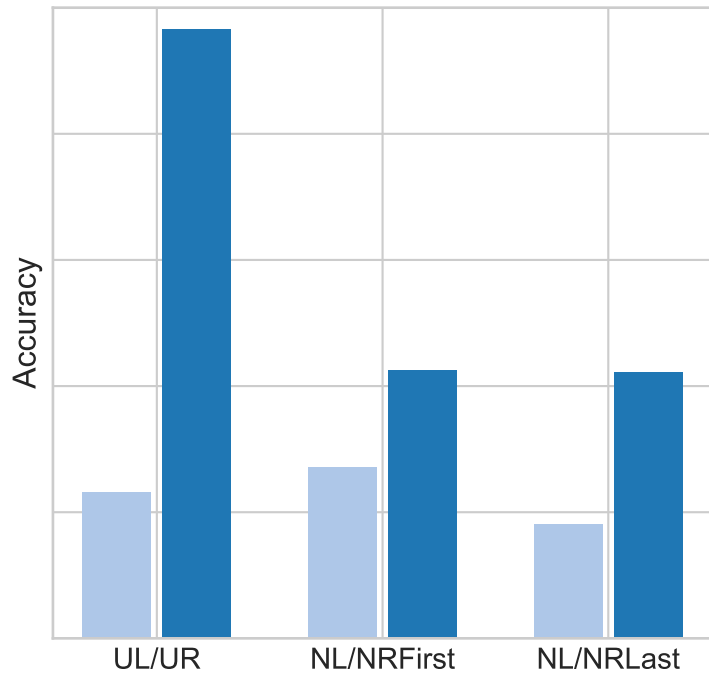

Supplement: supplementary_material [file fig_task_pairs_ordered.pdf › visualisations/fig_task_pairs_ordered.pdf]

Qwen2.5-32B-Instruct

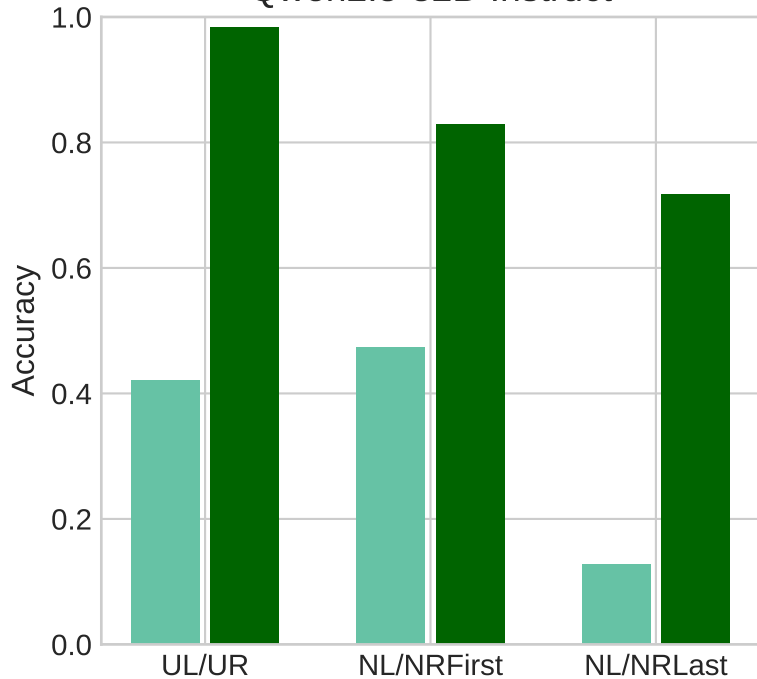

Llama3-70B-70B-Instruct

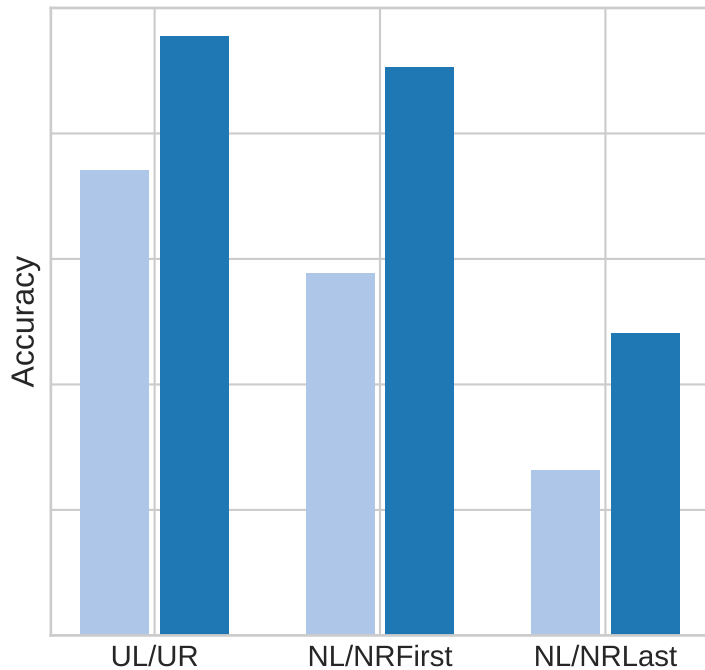

Supplement: supplementary_material [file fig_task_pairs_ordered_instruct.pdf › visualisations/fig_task_pairs_ordered_instruct.pdf]

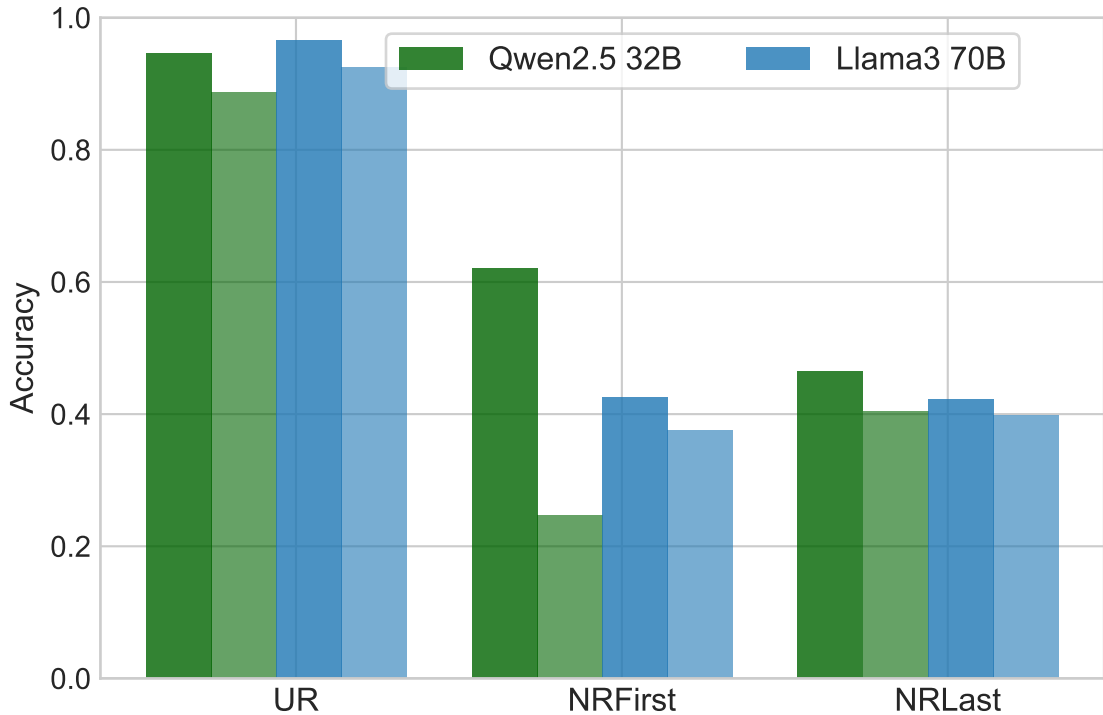

Supplement: supplementary_material [file fig_top2_prompts.pdf › visualisations/fig_top2_prompts.pdf]

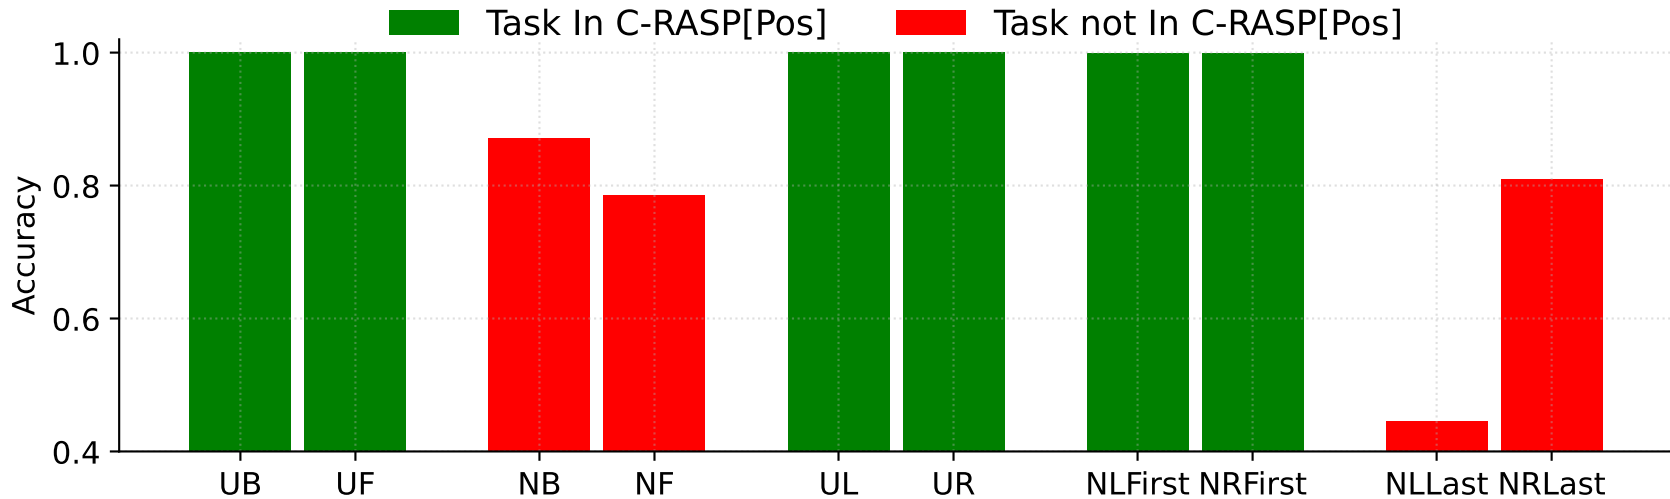

Supplement: supplementary_material [file finetune.pdf › visualisations/finetune.pdf]

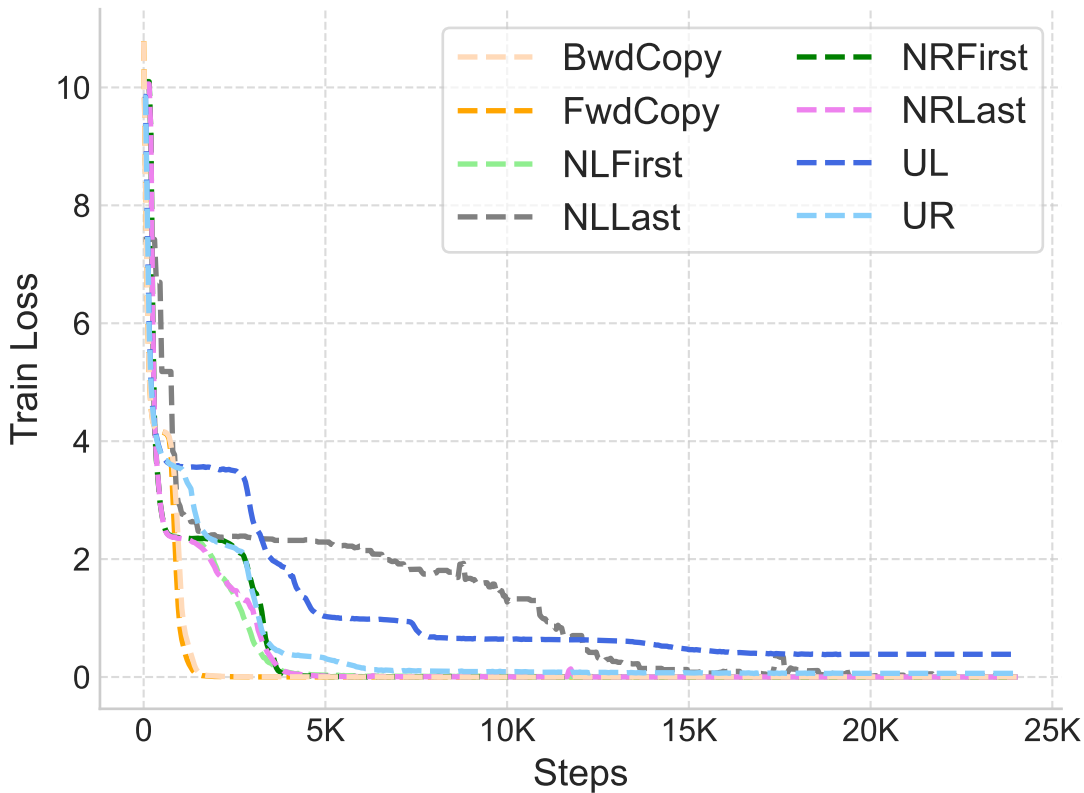

Supplement: supplementary_material [file finetuned_loss.pdf › visualisations/finetuned_loss.pdf]

■ Unambiguous    ■ Ambiguous

## LLama 3

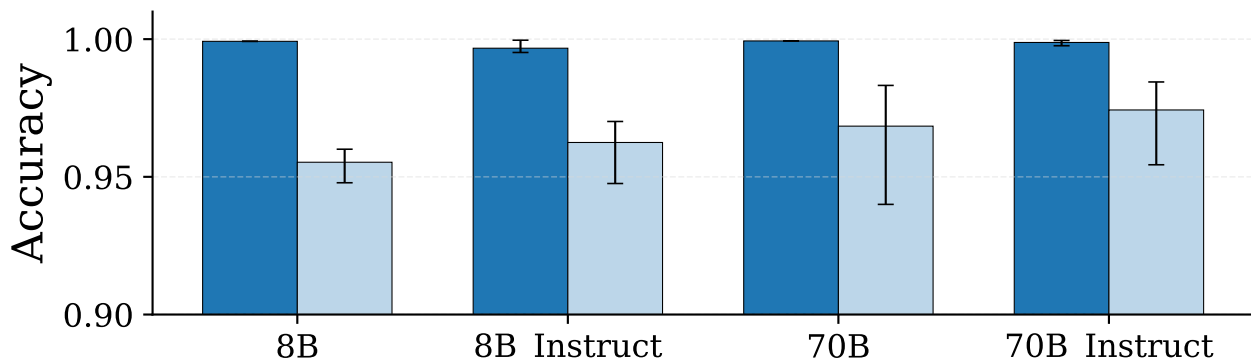

## Qwen 2.5

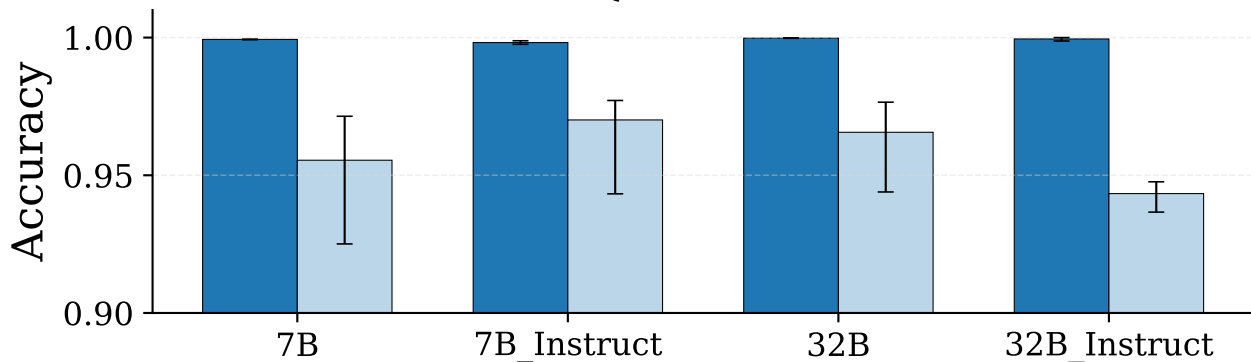

Supplement: supplementary_material [file loremipsum.pdf › visualisations/loremipsum.pdf]

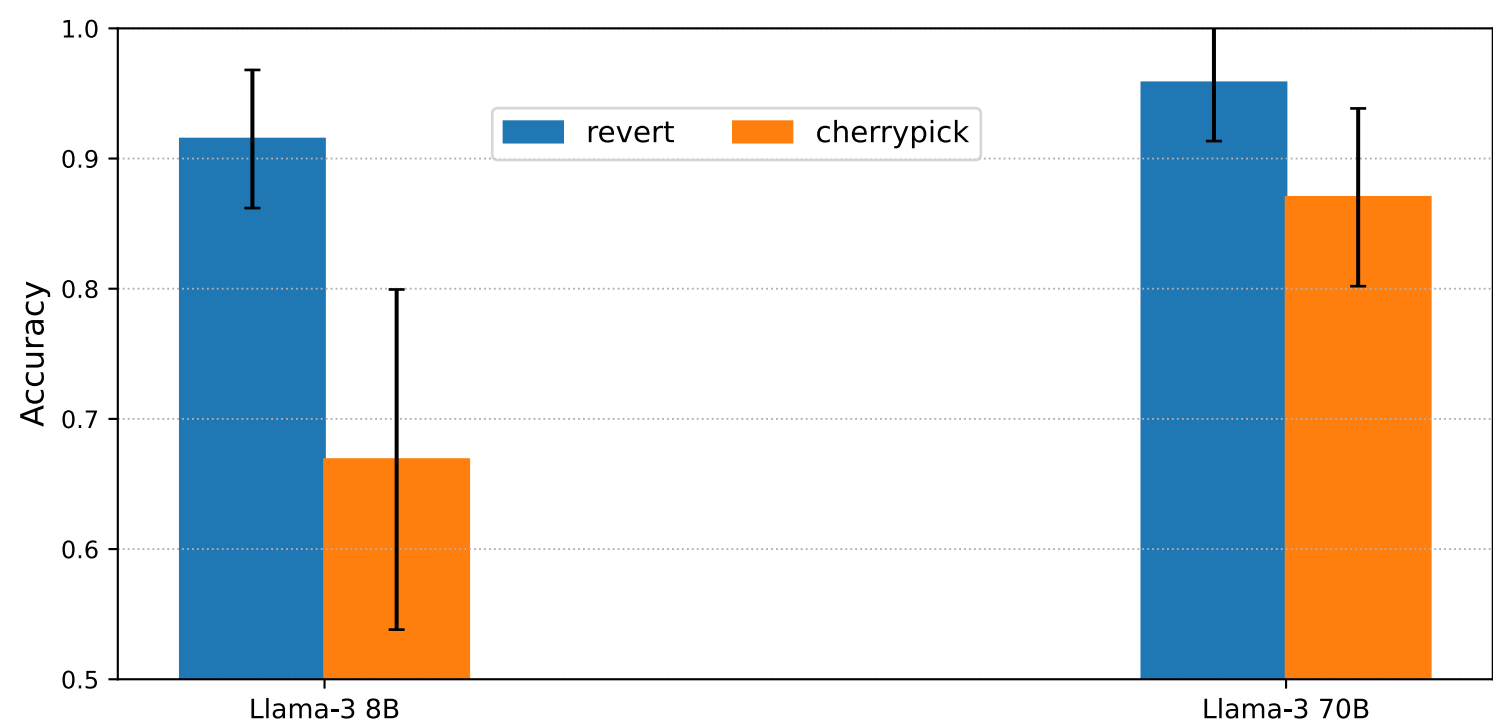

Supplement: supplementary_material [file revert_cherrypick.pdf › visualisations/revert_cherrypick.pdf]

—●— In C-RASP[Pos]      —●— Not in C-RASP[Pos]

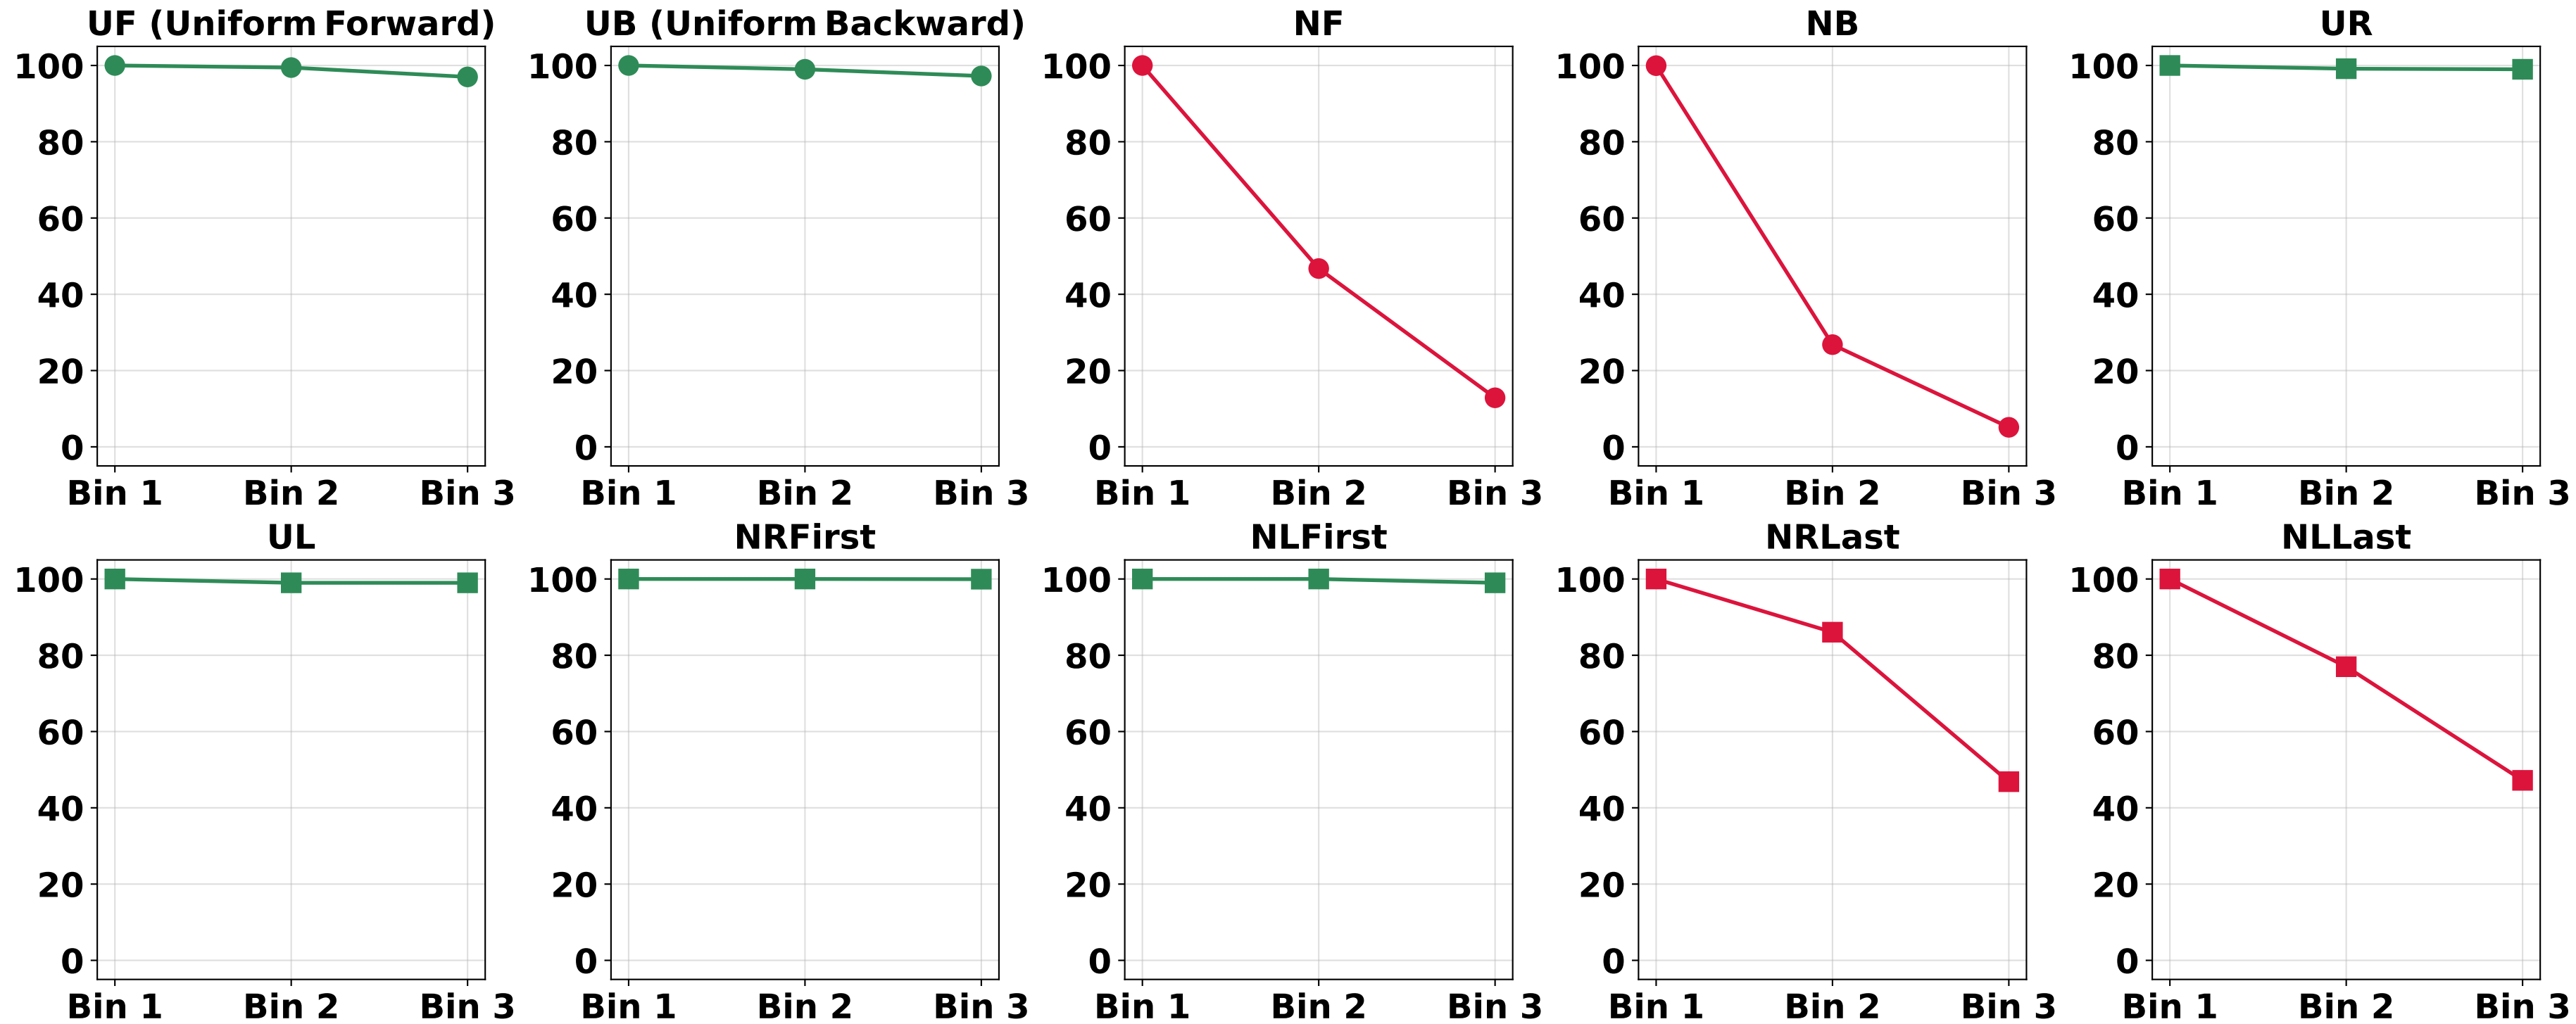

Supplement: supplementary_material [file tasks_accuracy.pdf › visualisations/tasks_accuracy.pdf]

—●— In C-RASP[Pos]      —●— Not in C-RASP[Pos]

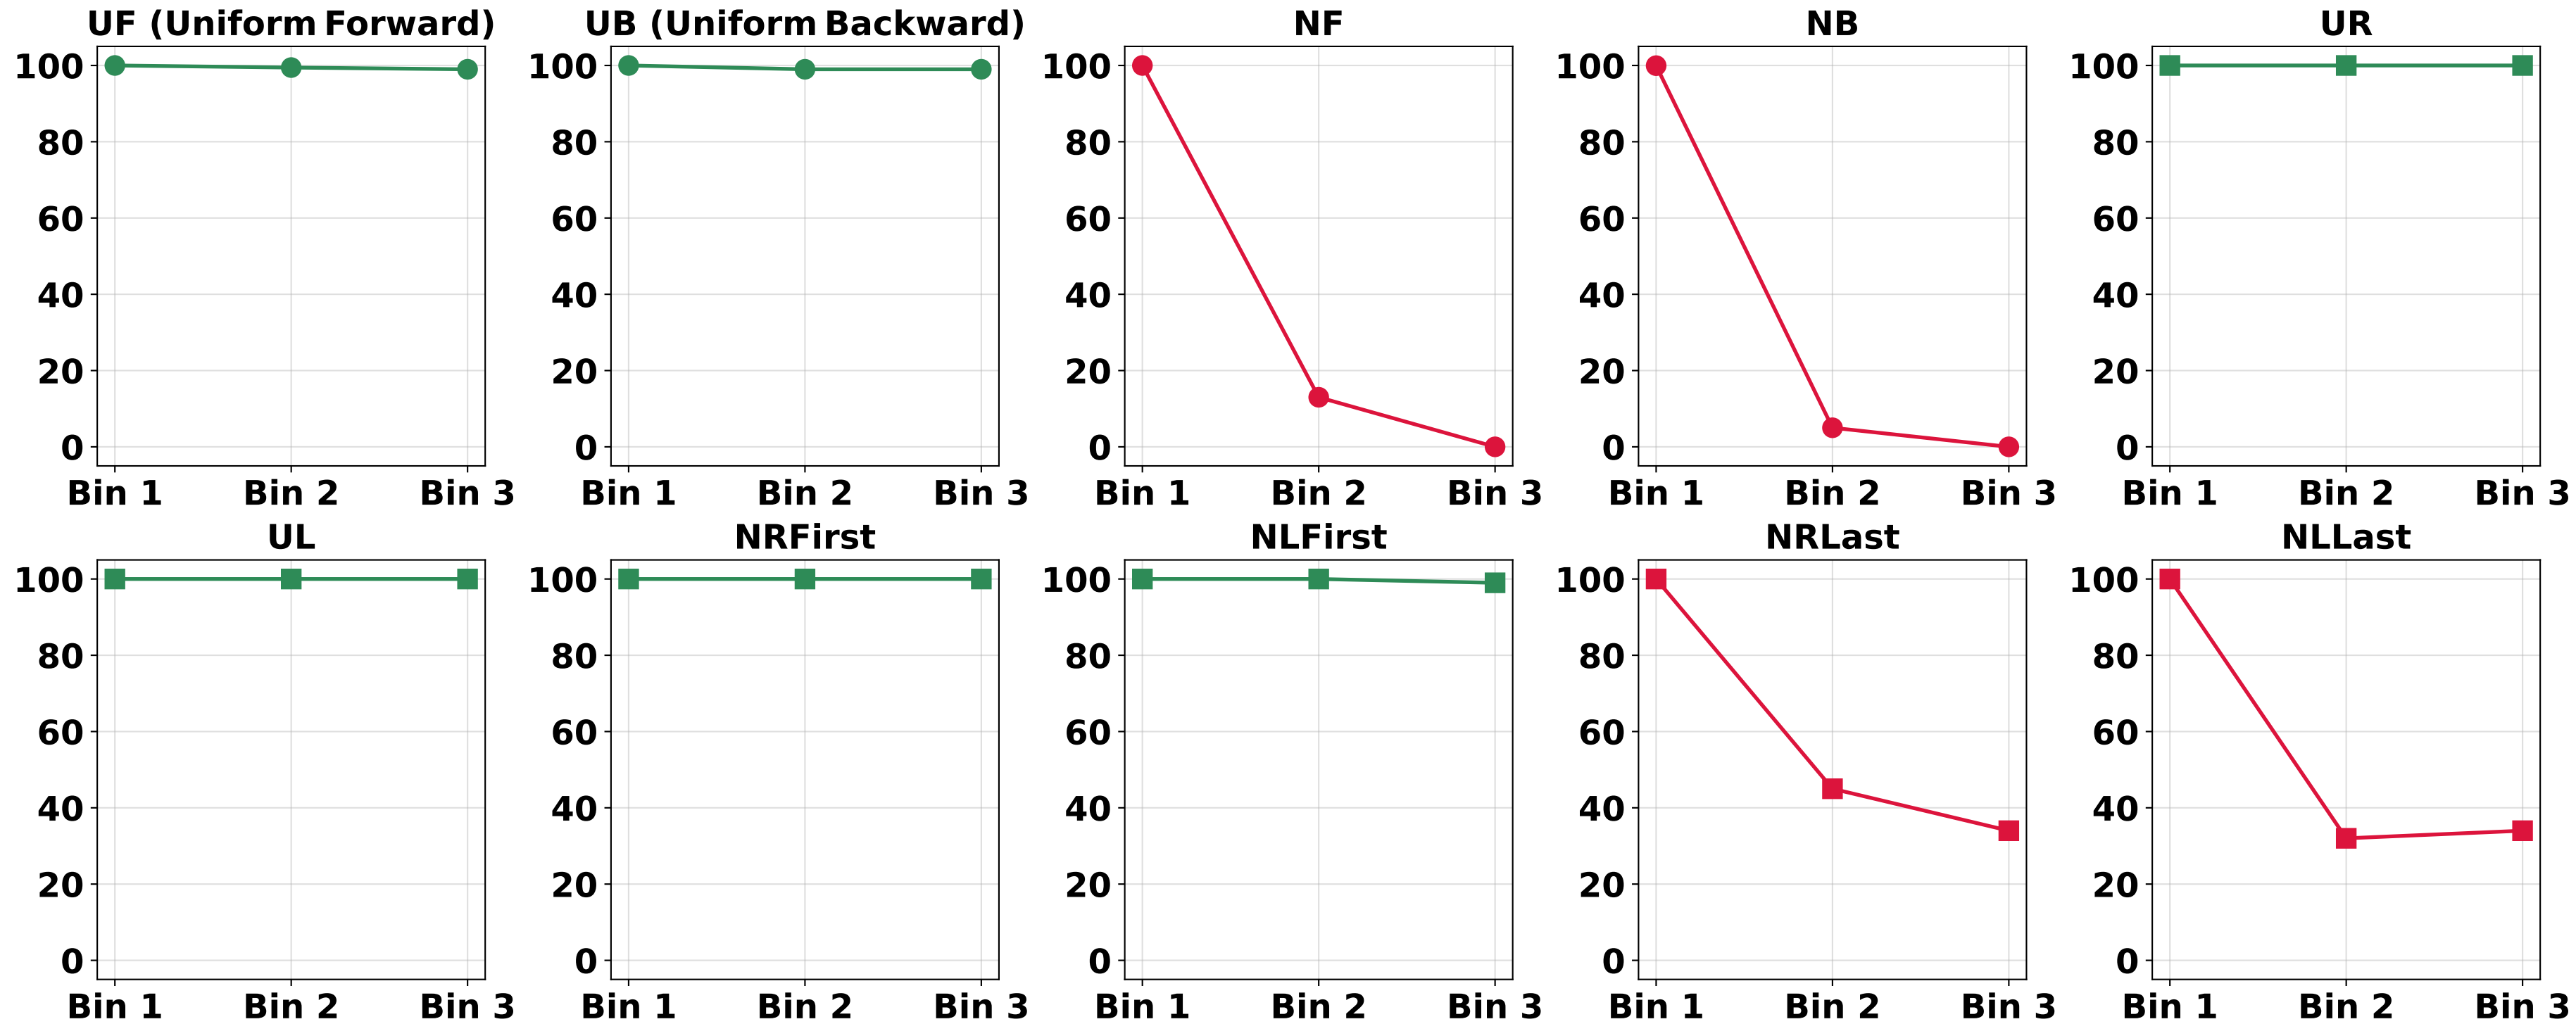

Supplement: supplementary_material [file tasks_accuracy_rope.pdf › visualisations/tasks_accuracy_rope.pdf]
